# Supplementary material for: Development and Validation of a Concise Objectifiable Risk Evaluation Score for Non-Relapse Mortality after Allogeneic Hematopoietic Stem Cell Transplantation
Source: MDPI journal article supplement (doi:10.3390/cancers16030515), 2024-01-25

## Supplementary Data

### Tables

**Table S1: Patients' characteristics Data**

| Data                                                                                                                                                                                                                                                                        |
|-----------------------------------------------------------------------------------------------------------------------------------------------------------------------------------------------------------------------------------------------------------------------------|
| Patient-related data                                                                                                                                                                                                                                                        |
| Gender                                                                                                                                                                                                                                                                      |
| Karnofsky Index                                                                                                                                                                                                                                                             |
| ECOG                                                                                                                                                                                                                                                                        |
| BMI                                                                                                                                                                                                                                                                         |
| Age                                                                                                                                                                                                                                                                         |
| CMV status                                                                                                                                                                                                                                                                  |
| Diagnosis                                                                                                                                                                                                                                                                   |
| Disease risk                                                                                                                                                                                                                                                                |
| Laboratory data                                                                                                                                                                                                                                                             |
| Serum albumin                                                                                                                                                                                                                                                               |
| Serum bilirubin                                                                                                                                                                                                                                                             |
| Serum creatinine                                                                                                                                                                                                                                                            |
| Serum GOT                                                                                                                                                                                                                                                                   |
| Serum GPT                                                                                                                                                                                                                                                                   |
| Serum CRP                                                                                                                                                                                                                                                                   |
| Serum NT-proBNP                                                                                                                                                                                                                                                             |
| Serum albumin (electrophoresis)                                                                                                                                                                                                                                             |
| Serum vitamin D                                                                                                                                                                                                                                                             |
| Echocardiography                                                                                                                                                                                                                                                            |
| Transthoracic echocardiography (left ventricular ejection fraction, LVEF)                                                                                                                                                                                                   |
| Lung function tests                                                                                                                                                                                                                                                         |
| Vital capacity (VC)                                                                                                                                                                                                                                                         |
| Forced expiratory volume (FEV1)                                                                                                                                                                                                                                             |
| Tiffeneau-Index (FEV1/VC)                                                                                                                                                                                                                                                   |
| Diffusing capacity for carbon monoxide (DLCO)                                                                                                                                                                                                                               |
| Diffusing capacity corrected for hemoglobin (DLCOc)                                                                                                                                                                                                                         |
| ECOG - Eastern Cooperative Oncology Group Performance Status, BMI - Body mass index, CMV - Cytomegalovirus, GOT - Glutamic-oxaloacetic transaminase, GPT - Glutamate-pyruvate transaminase, CRP - C-reactive protein, NT-proBNP - N-terminal pro-B-type natriuretic peptide |

**Table S2: Sum of the weighted scores for 2-year NRM**

| Score | Training cohort |                 |             | Validation cohort |                 |             |
|-------|-----------------|-----------------|-------------|-------------------|-----------------|-------------|
|       | Patients (%)    | HR (95% CI)     | 2-y-NRM (%) | Patients (%)      | HR (95% CI)     | 2-y-NRM (%) |
| 0     | 18              | reference       | 12          | 21                | reference       | 12          |
| 1     | 22              | 0.67 (0.3-1.6)  | 7           | 23                | 1.18 (0.4-3.4)  | 14          |
| 2     | 25              | 2.02 (1.0-4.0)  | 22          | 27                | 1.31 (0.5-3.6)  | 16          |
| 3     | 18              | 1.90 (0.9-4.0)  | 19          | 14                | 3.66 (1.4-9.7)  | 34          |
| 4     | 9               | 3.05 (1.4-6.7)  | 28          | 9                 | 3.00 (1.0-9.0)  | 32          |
| ≥5    | 9               | 5.52 (2.6-11.6) | 46          | 6                 | 6.07 (2.0-18.3) | 48          |

For the training cohort  $n=553$ , for the validation cohort  $n=267$

**Table S3: Sum of the weighted scores for second validation for 2-years NRM**

| Second validation cohort |              |                 |             |
|--------------------------|--------------|-----------------|-------------|
| Score                    | Patients (%) | HR (95% CI)     | 2-y-NRM (%) |
| 0                        | 18           | 1               | 7           |
| 1                        | 24           | 1.5 (0.3-8)     | 8           |
| 2                        | 25           | 2.65 (0.6-12.4) | 14          |
| 3                        | 16           | 3.79 (0.8-18.1) | 20*         |
| 4                        | 10           | 8.13 (1.7-37.9) | 35          |
| ≥5                       | 8            | 8.36 (1.8-39.9) | 43*         |

For the second validation cohort  $n=205$ , \*data only available for day 717

**Table S4: Subgroup analysis for CORE score of the training, first validation and second validation cohorts**

| Subgroup          | Pat (%)  | HR (95% CI)    | 2-year NRM | p-value |
|-------------------|----------|----------------|------------|---------|
| MAC               | 583      |                |            | <0.001  |
| low risk          | 273 (47) |                | 10         |         |
| intermediate risk | 282 (48) | 2.45 (1.6-3.9) | 21         | <0.001  |
| high risk         | 28 (5)   | 5.28 (2.5-11)  | 40         | <0.001  |
| RIC               | 442      |                |            | <0.001  |
| low risk          | 146 (33) |                | 12         |         |

| Subgroup          | Pat (%)  | HR (95% CI)      | 2-year NRM | p-value |
|-------------------|----------|------------------|------------|---------|
| intermediate risk | 243 (55) | 2.34 (1.3-4.1)   | 23         | 0.03    |
| high risk         | 53 (12)  | 6.24 (3.3-11.9)  | 50         | <0.001  |
| no ATG            | 197      |                  |            | <0.001  |
| low risk          | 90 (46)  |                  | 15         |         |
| intermediate risk | 102 (52) | 2.01 (1.1-3.8)   | 27         | 0.03    |
| high risk         | 5 (2)    | 12.95 (3.4-48.8) | -          | <0.001  |
| with ATG          | 828      |                  |            | <0.001  |
| low risk          | 329 (40) |                  | 9          |         |
| intermediate risk | 423 (51) | 2.64 (1.7-4.0)   | 21         | <0.001  |
| high risk         | 76 (9)   | 6.46 (3.9-10.9)  | 44         | <0.001  |
| AML               | 397      |                  |            | <0.001  |
| low risk          | 118 (30) |                  | 11         |         |
| intermediate risk | 226 (57) | 1.82 (0.9-3.6)   | 16         | 0.087   |
| high risk         | 53 (13)  | 7.13 (3.5-14.6)  | 51         | <0.001  |
| MDS               | 150      |                  |            | 0.027   |
| low risk          | 76 (51)  |                  | 10         |         |
| intermediate risk | 64 (43)  | 1.46 (0.6-3.7)   | 14         | 0.43    |
| high risk         | 10 (7)   | 4.89 (1.6-15.3)  | 42         | 0.006   |
| HD+NHL            |          |                  |            | -       |
| low risk          | 39 (36)  |                  | 8          |         |
| intermediate risk | 69 (61)  | -                | 42         | -       |
| high risk         | 3 (3)    | -                | 0          | -       |
| MF                | 133      |                  |            | 0.003   |
| low risk          | 66 (50)  |                  | 8          |         |
| intermediate risk | 62 (47)  | 4.67 (1.6-13.9)  | 24         | 0.005   |
| high risk         | 5 (4)    | 9.58 (1.9-49.7)  | 40         | 0.007   |
| MRD               | 205      |                  |            | <0.001  |
| low risk          | 99 (48)  |                  | 7          |         |
| intermediate risk | 99 (48)  | 4.05 (1.6-10)    | 21         | 0.003   |
| high risk         | 7 (3)    | 13.05 (2.7-62.3) | -          | 0.001   |
| MUD               | 793      |                  |            | <0.001  |
| low risk          | 307 (39) |                  | 11         |         |
| intermediate risk | 414 (52) | 2.2 (1.5-3.3)    | 22         | <0.001  |
| high risk         | 72 (9)   | 5.27 (3.2-8.7)   | 45         | <0.001  |
| Haplo-ident       | 27       |                  |            | 0.046   |
| low risk          | 13 (48)  |                  | 15         |         |
| intermediate risk | 12 (44)  | 1.84 (0.4-7.6)   | 34         | 0.4     |
| high risk         | 2 (7)    | 8.4 (1.9-36.6)   | -          | 0.004   |

For the training, first validation and second validation cohorts,  $n=1025$

MAC - Myeloablative conditioning, RIC - Reduced intensity conditioning, ATG - Anti-thymocyte globulin, AML - Acute myeloid leukemia, MDS - Myelodysplastic syndrome, HD - Hodgkin's disease, NHL - Non Hodgkin's disease, MF - Myelofibrosis, MRD - Matched related donor, MUD - Matched unrelated donor

**Table S5: Multivariate analysis of CORE, transplant-related parameters and performance status**

| Factor                                     | HR (95% CI)      | p-value |
|--------------------------------------------|------------------|---------|
| CORE low                                   | <i>reference</i> |         |
| CORE intermediate                          | 2.06 (1.4-3.1)   | <0.001  |
| CORE high                                  | 5.09 (2.9-8.9)   | <0.001  |
| ATG based                                  | <i>reference</i> |         |
| without ATG                                | 1.52 (1-2.3)     | 0.049   |
| no TBI                                     | <i>reference</i> |         |
| TBI                                        | 1.09 (0.7-1.7)   | 0.7     |
| MAC                                        | <i>reference</i> |         |
| RIC                                        | 1.2 (0.8-1.7)    | 0.32    |
| MRD                                        | <i>reference</i> |         |
| MUD                                        | 1.19 (0.8-1.9)   | 0.44    |
| Missmatch                                  | 1.68 (1-2.8)     | 0.044   |
| Recipient CMV serostatus negative          | <i>reference</i> |         |
| Recipient CMV serostatus positive          | 1.41 (1-2)       | 0.041   |
| Recipient Donor Sex other than male/female | <i>reference</i> |         |
| Recipient Donor Sex male/female            | 1.53 (1-2.4)     | 0.06    |
| ECOG 1 + 2                                 | <i>reference</i> |         |
| ECOG 3 + 4                                 | 2.05 (1.4-3.1)   | <0.001  |

For the training, first and second validation cohorts with  $n=931$

Adjusted for disease risk

ATG - Anti-thymocyte globulin, TBI - Total body irradiation, MAC - Myeloablative conditioning, RIC - Reduced intensity conditioning, CMV - Cytomegalovirus, ECOG - Eastern Cooperative Oncology Group Performance Status

**Table S6: Subgroup analysis for ECOG, NRM for CORE and ECOG combined**

|                   | CORE HCT <sup>1</sup> |                |        |         | ECOG Subgroup <sup>1</sup> |             |                |         |
|-------------------|-----------------------|----------------|--------|---------|----------------------------|-------------|----------------|---------|
|                   | Pat. (%)              | HR (95% CI)    | p (%)  | 2-y (%) | Pat. (%)                   | HR (95% CI) | p (%)          | 2-y (%) |
| Total             |                       |                | <0.001 |         | Total                      |             | <0.001         |         |
| CORE low          | 41                    | reference      |        | 10      | ECOG 1+2                   | 81          | reference      | 15      |
| CORE intermediate | 51                    | 2.43 (1.7-3.5) | <0.001 | 22      | ECOG 3+4                   | 11          | 2.96 (2.1-4.3) | <0.001  |
| CORE high         | 8                     | 6.09 (3.8-9.7) | <0.001 | 46      | <i>missing data</i>        | 8           |                |         |

<sup>1</sup>For the training, first and second validation with  $n=1025$

**Table 6 (continued):**

| CORE and ECOG combined <sup>2</sup> |                 |        |         |                 |        |         |
|-------------------------------------|-----------------|--------|---------|-----------------|--------|---------|
|                                     | ECOG 1+2        |        |         | ECOG 3+4        |        |         |
|                                     | HR (95% CI)     | p (%)  | 2-y (%) | HR (95% CI)     | p (%)  | 2-y (%) |
| Total                               |                 | <0.001 |         |                 | <0.001 |         |
| CORE low                            | reference       |        | 9       | 2.67 (0.6-11.7) | 0.19   | 20      |
| CORE intermediate                   | 2.12 (1.4-3.2)  | <0.001 | 18      | 4.96 (3-8.2)    | <0.001 | 36      |
| CORE high                           | 6.21 (3.5-11.1) | <0.001 | 43      | 7.56 (3.7-15.6) | <0.001 | 48      |

<sup>2</sup>For the training, first and second validation with  $n=937$  (minus missing data)

## Figures

Figure S1: 2-Year NRM for CORE score for the first validation cohort

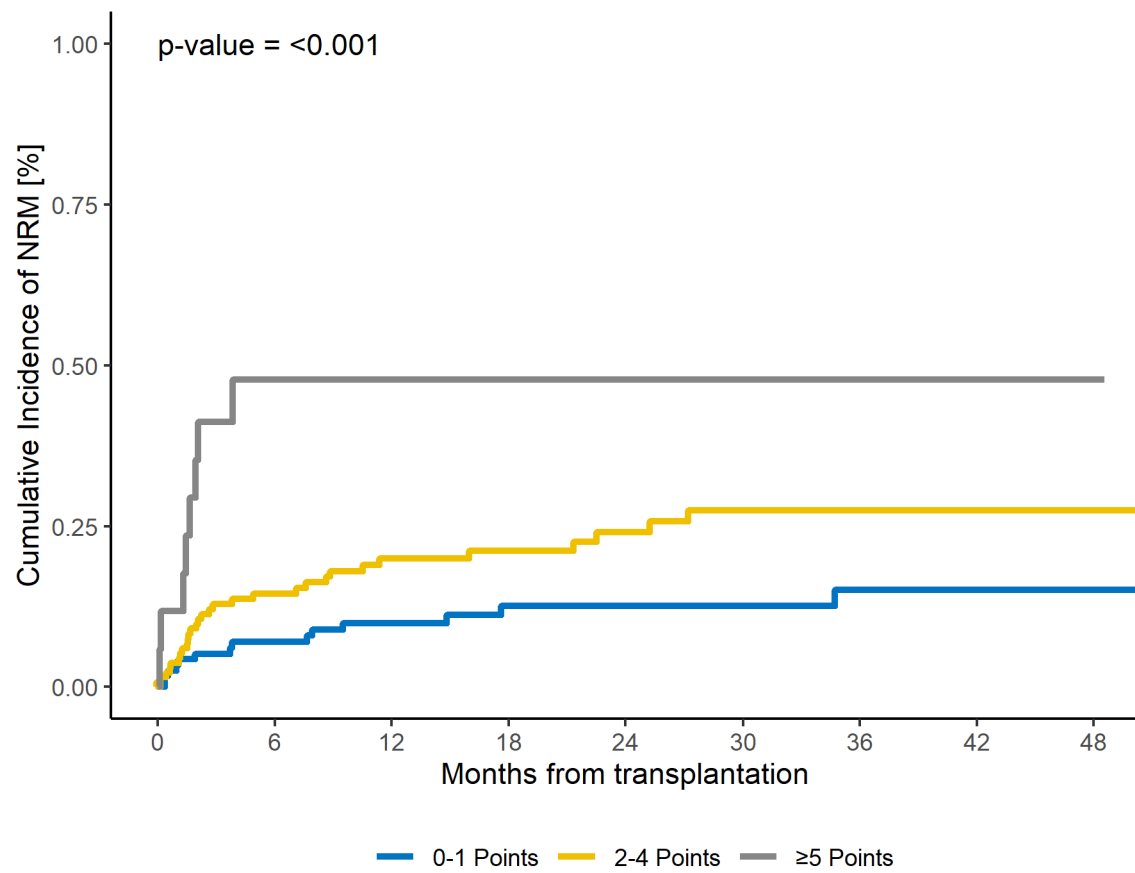

Figure S2: 2-Year OS for CORE score for the first validation cohort

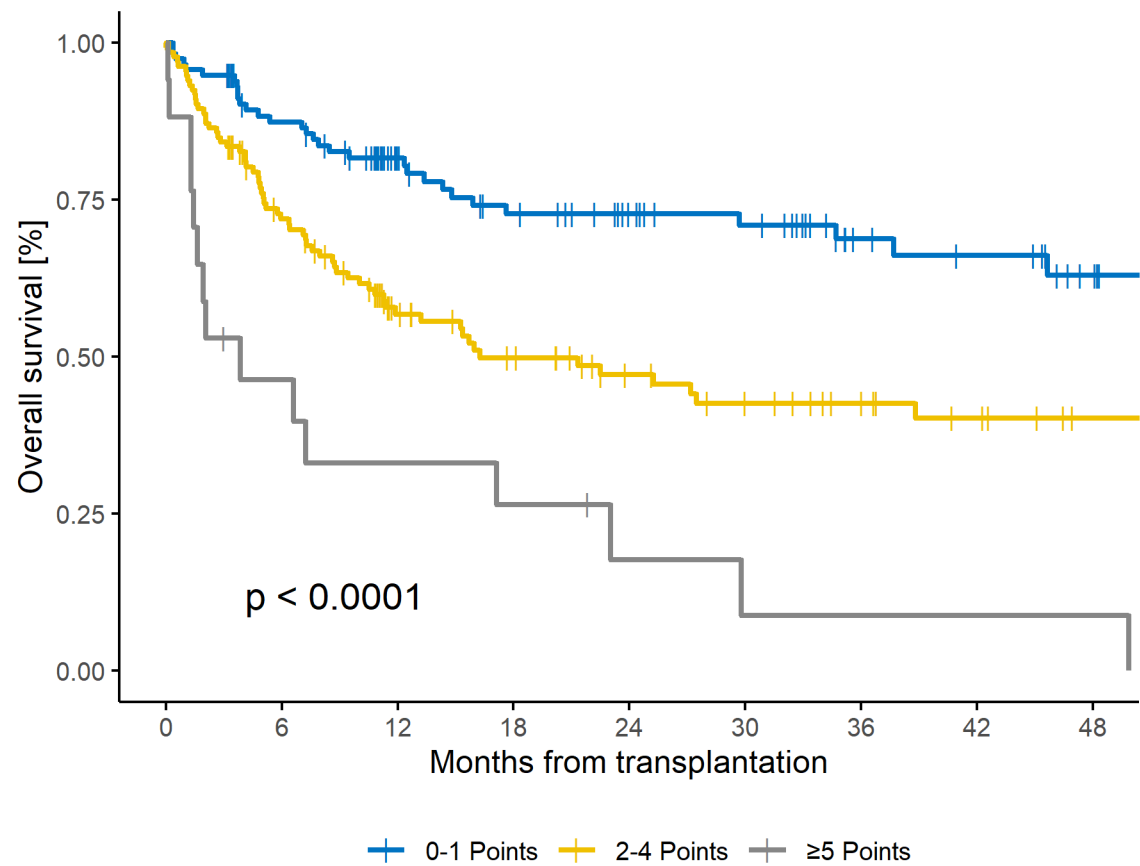

Figure S3: 2-Year NRM for CORE score for the second validation cohort

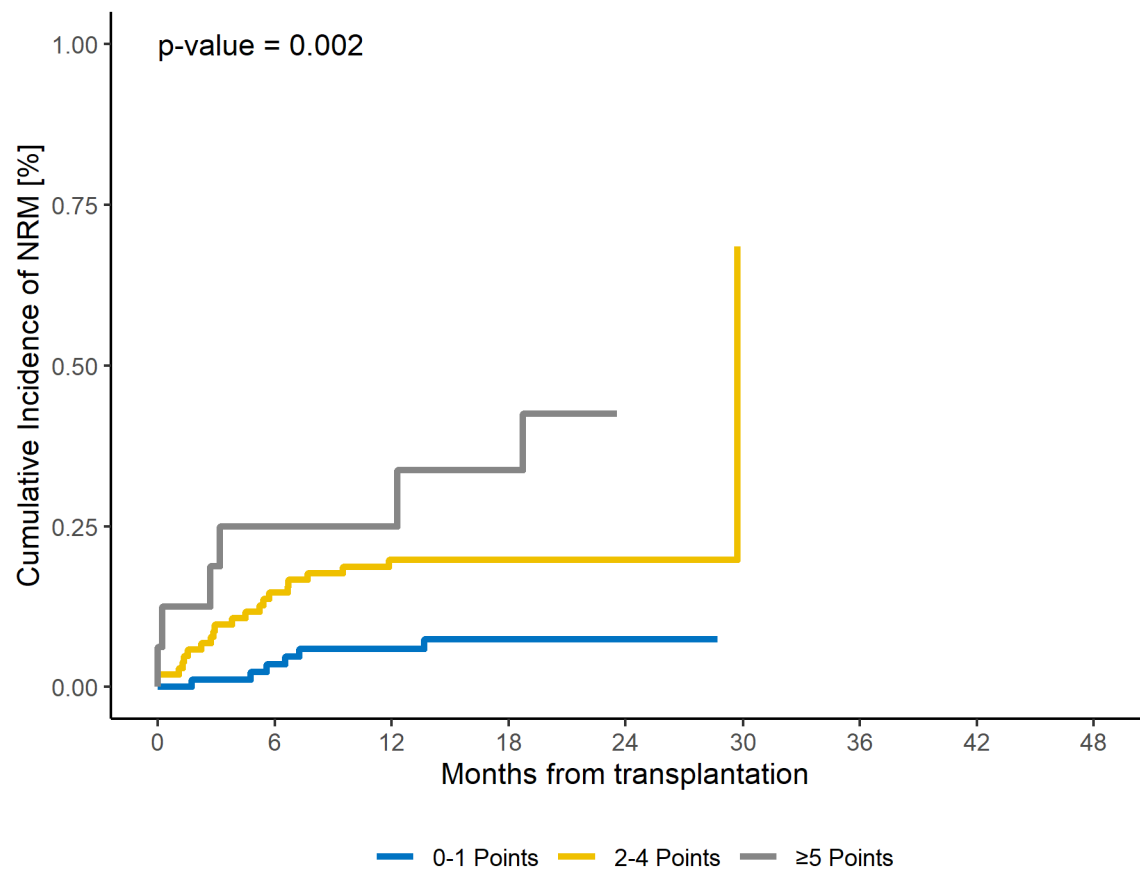



Figure S4: 2-Year OS for CORE score for the second validation cohort

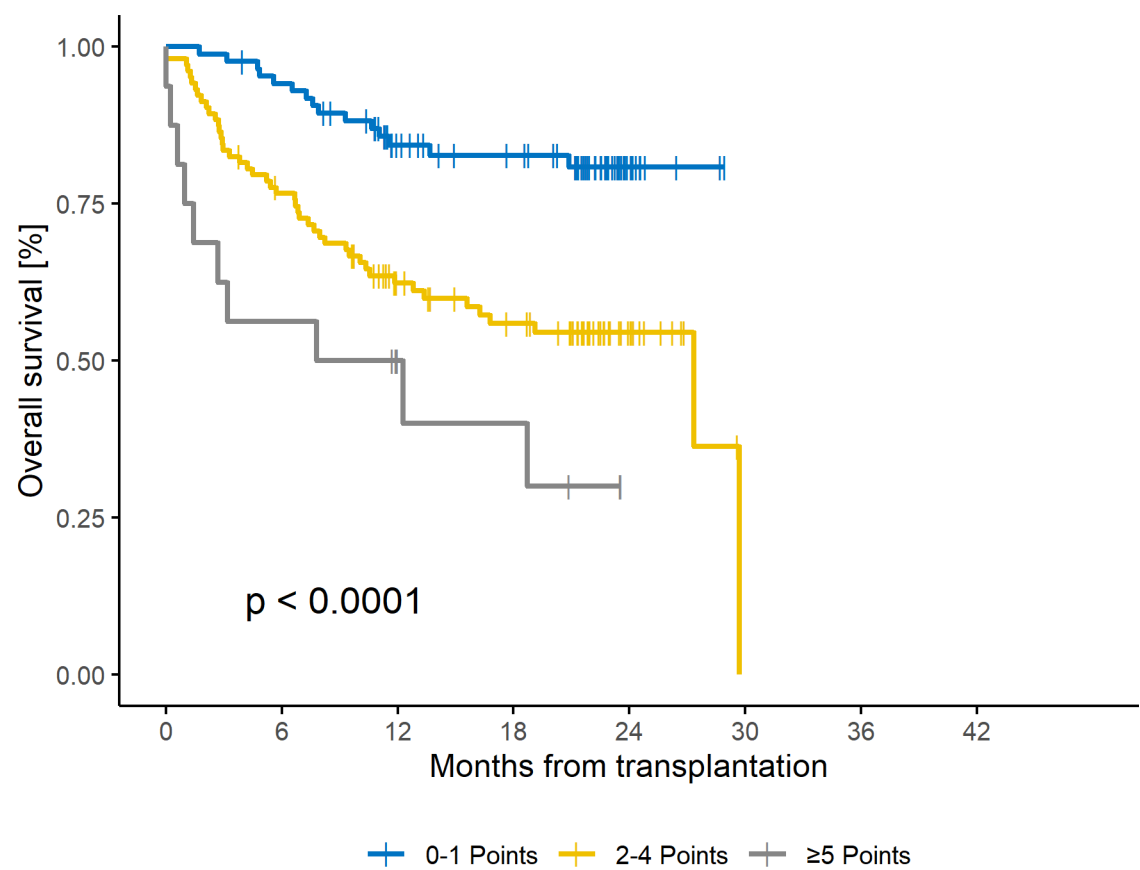

Figure S5: 2-year NRM for subgroup MAC

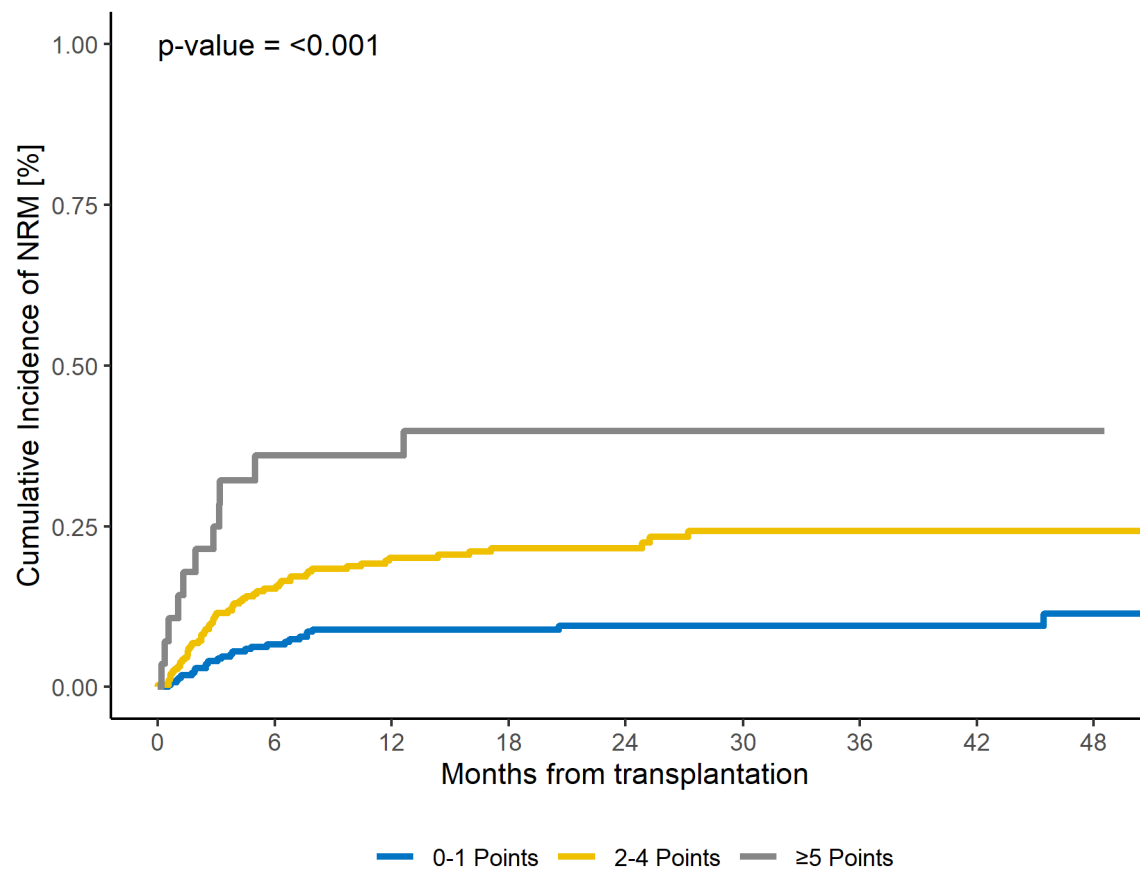

Figure S6: 2-year NRM for subgroup RIC

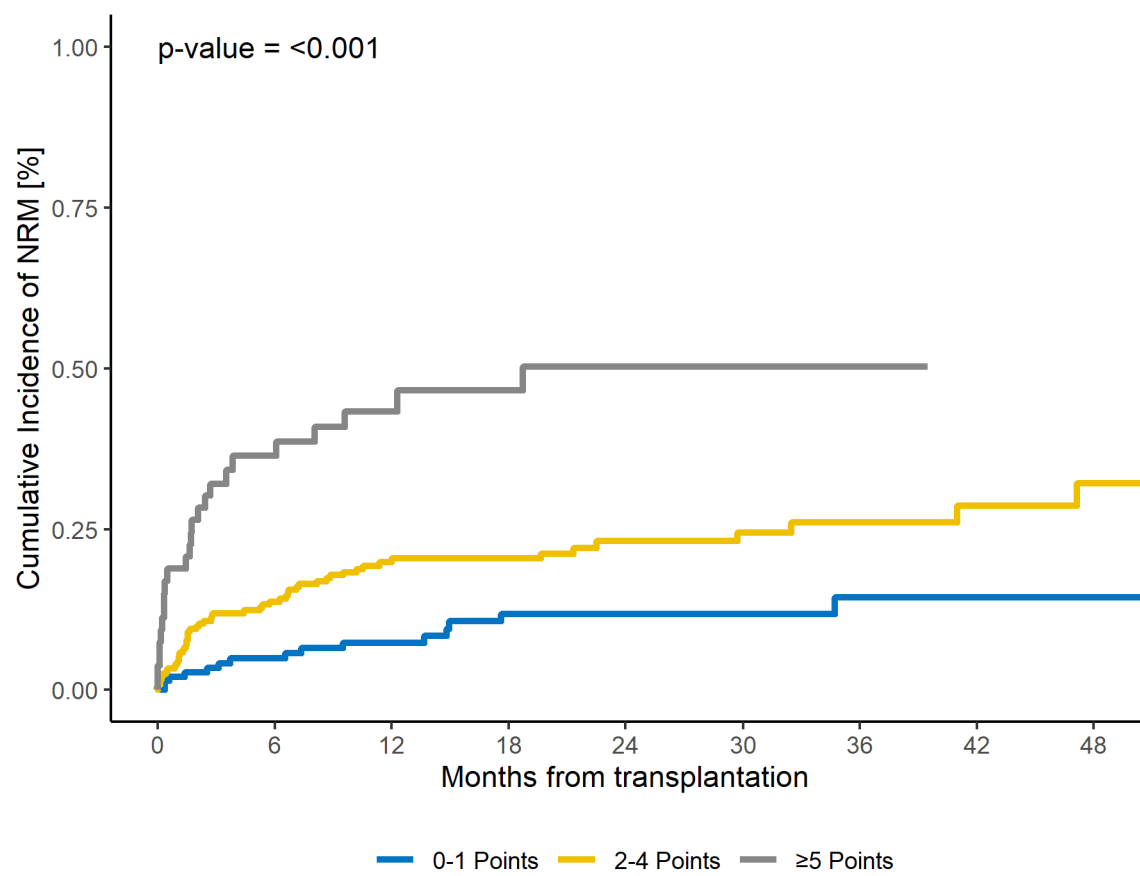

Figure S7: 2-year OS for subgroup MAC

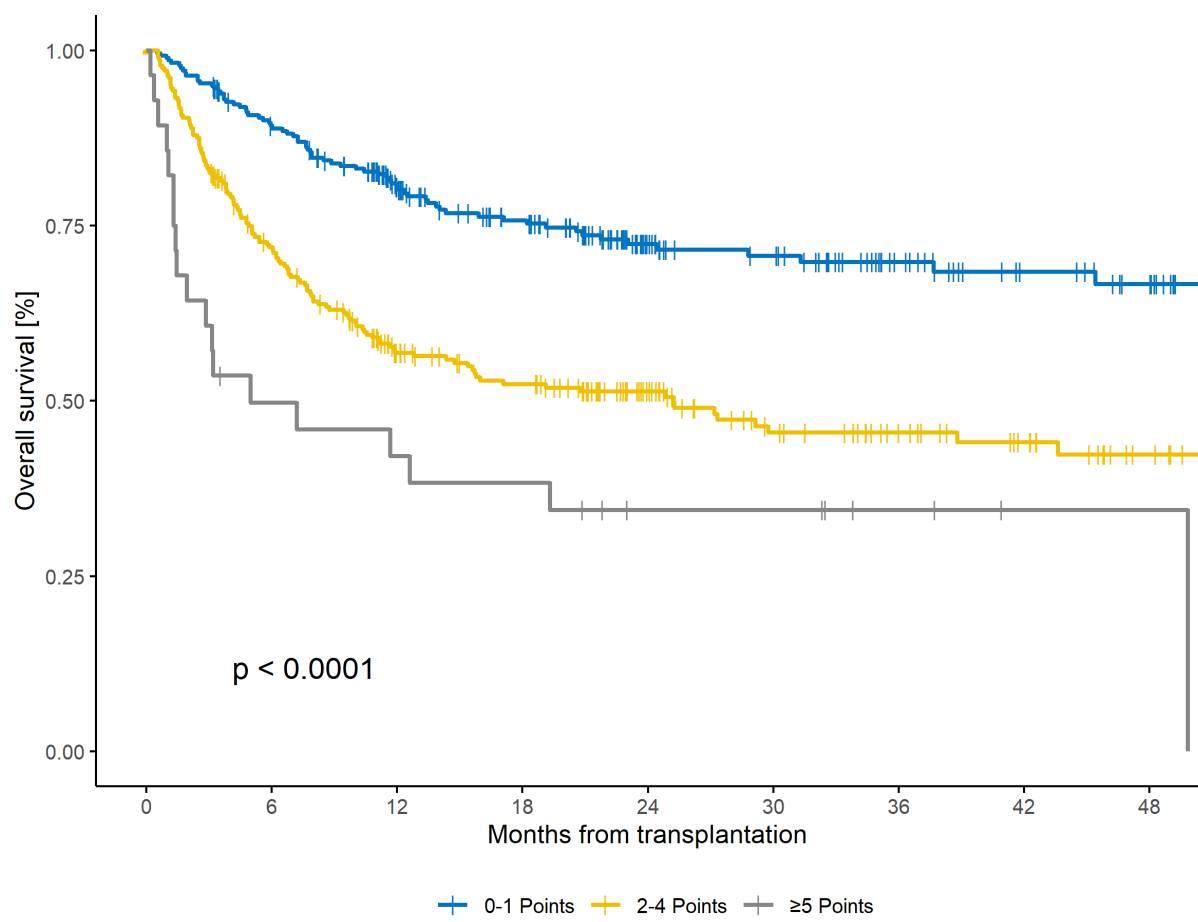

Figure S8: 2-year OS for subgroup RIC

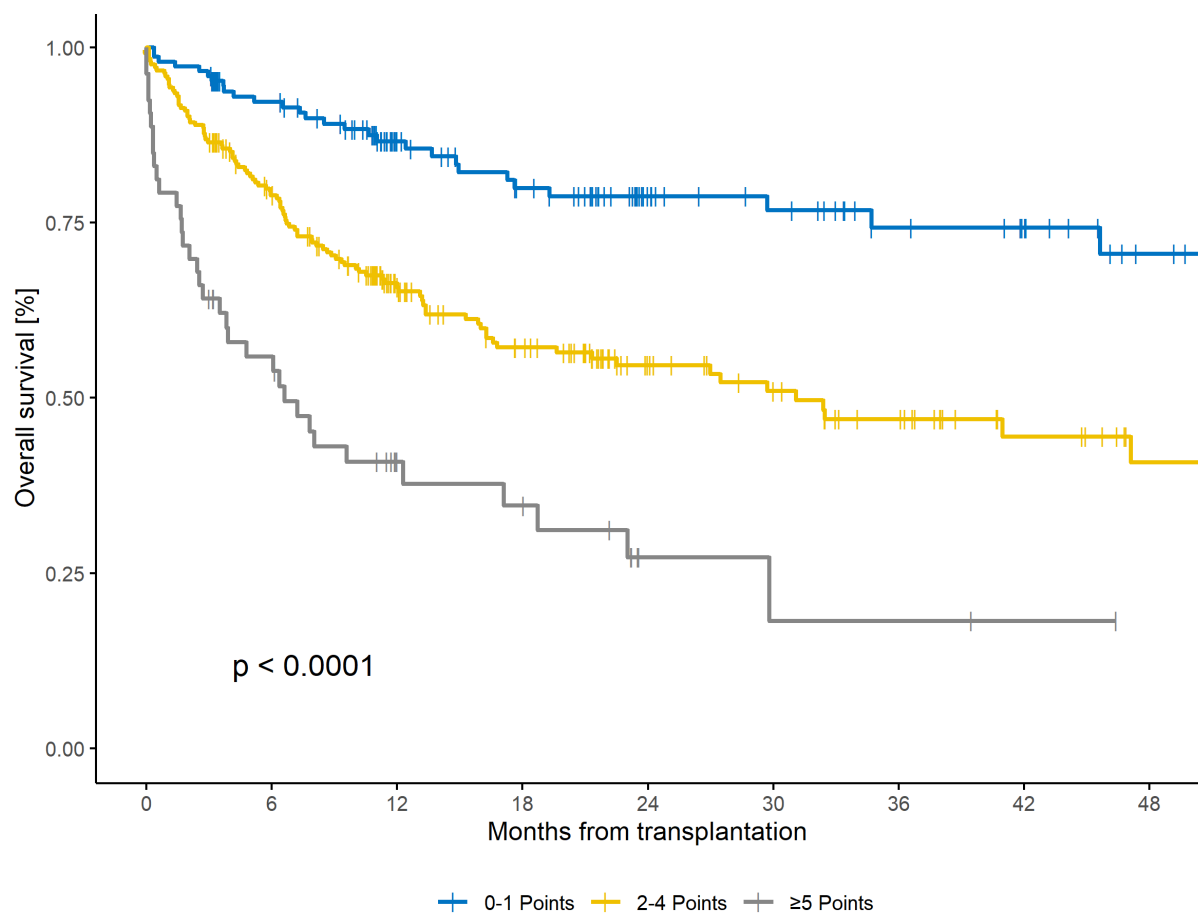

Figure S9: 2-year NRM of CORE score and ECOG status combined

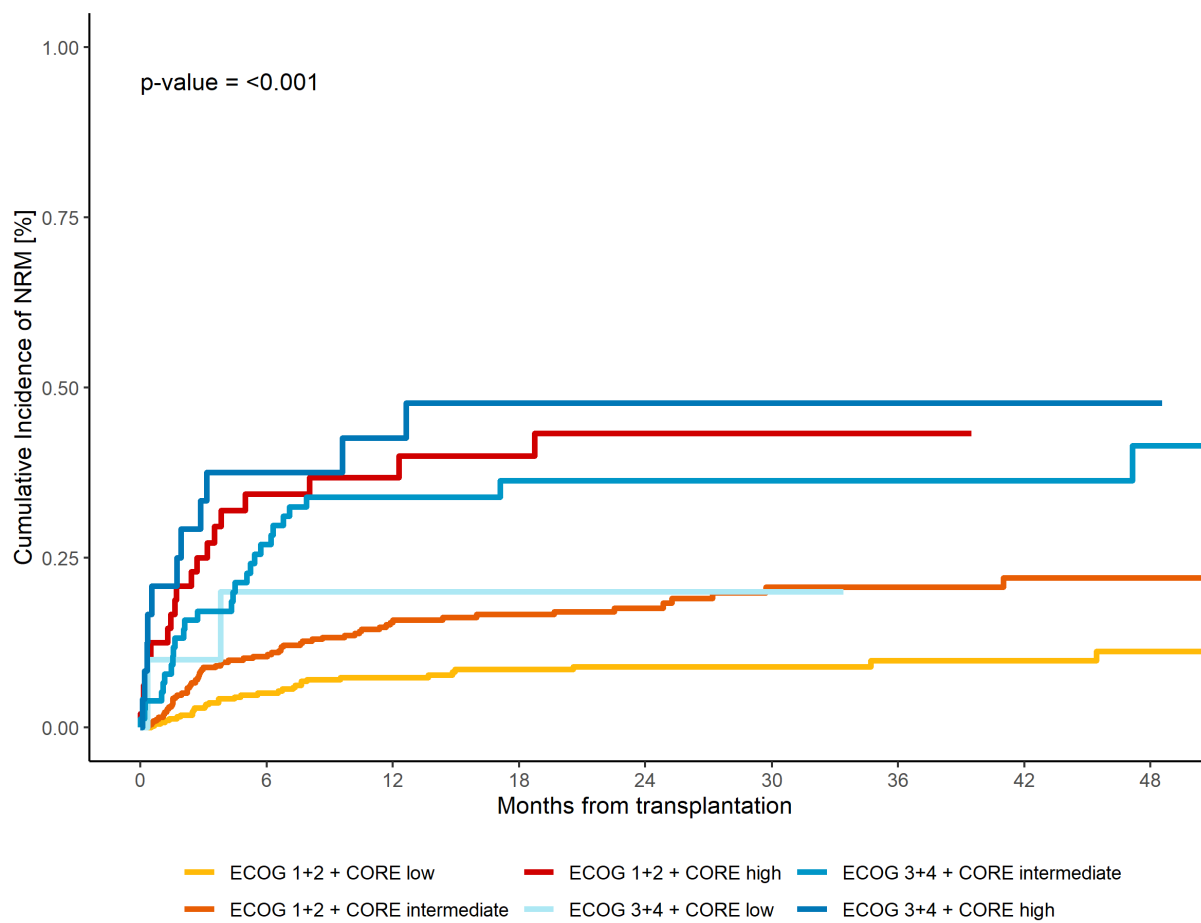

Supplement: s1 [file s1]
